# Supplementary material
Source: Springer Nature journal article supplement (https://www.springermedizin.de/resource/supplementary/12985_2010_912_MOESM2_ESM.pdf/9608728)

2a

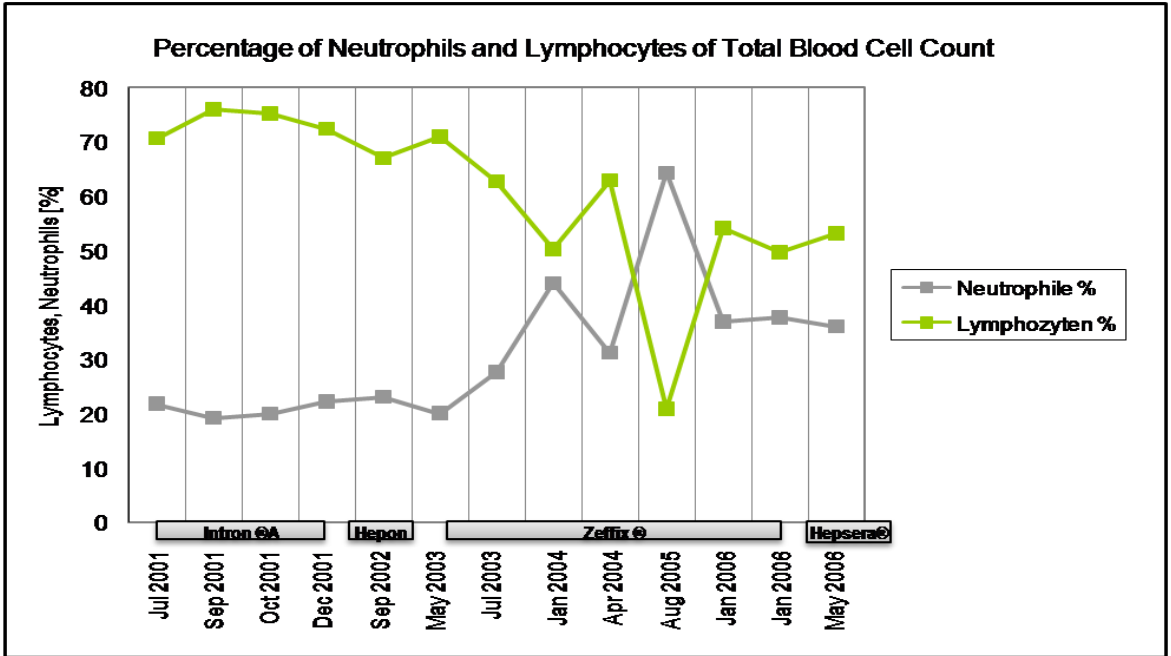

2b

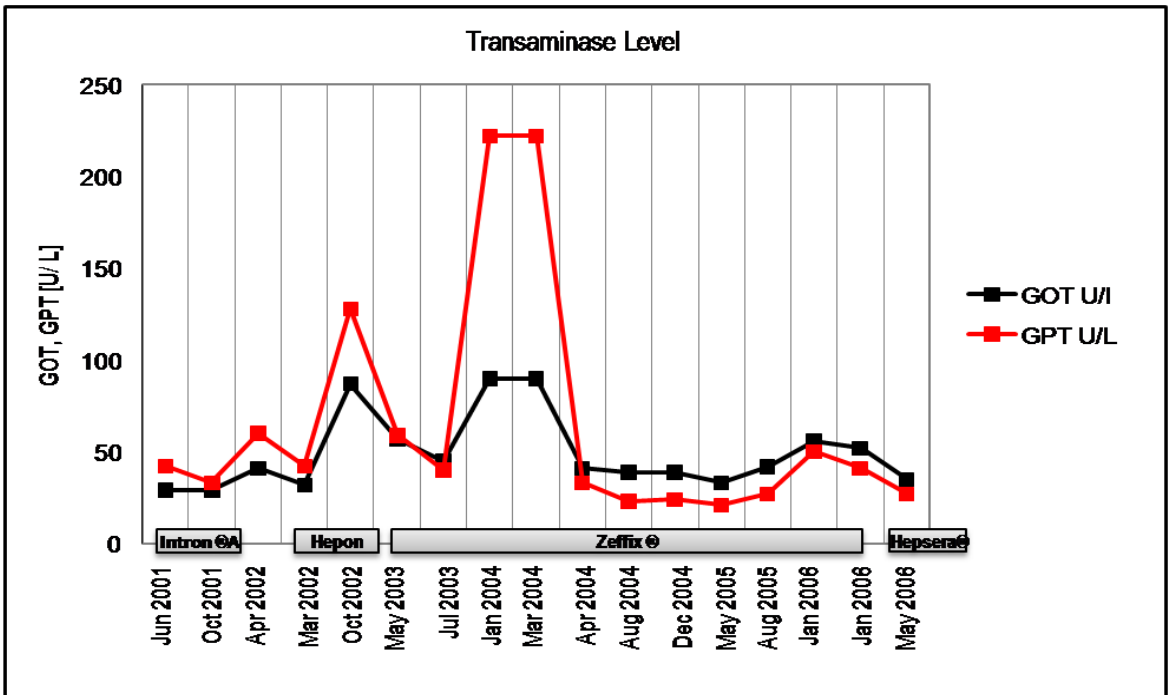

Supplement: MOESM2 [file 9608728]
